# Supplementary material for: Long Non-coding RNA FIRRE Acts as a miR-520a-3p Sponge to Promote Gallbladder Cancer Progression via Mediating YOD1 Expression
Source: Front Genet. 2021 Jun 8;12:674653. doi: 10.3389/fgene.2021.674653 (PMC8219055; doi:10.3389/fgene.2021.674653)
Supplement: Supplementary file 1 [file Table_1.xlsx]

## Sheet: Sheet1
Table 1. Univariate and multivariate Cox regression analysis of FIRRE and survival in patients with GBC.
Clinical variables	Univariate analysis	Multivariate analysis
	HR 95% CI P-value	HR	95% CI	P-value
Age	1:00 0.02–0.06 0:95
Gender	0:60 0.33–1.54 0:12
Adjacent organ invasion	3:57 0.08–5.91 0:42
Histological grade	1:967 0.36–4.64 0:23
Lymph node metastasis	2:8 0.34–3.07 0:00***	01:09:00	0.4–1.63	00:10:00
Tumor size	1:37 0.08–3.91 0:00***	01:28:00	0.09–2.71	0:01*
TNM stage	1:49 0.2–2.01 0:04*	01:07:00	0.21–0.31	0.0527778
Higher FIRRE	0:87 0.09–1.63 0:013*	03:45:00	1.46–6.23	0:02*
HR, hazard ratio; CI, confidence interval.
*P < 0.05, ***P < 0.001.
